# Supplementary figures and images for: α‐Synuclein RT‐QuIC assay in cerebrospinal fluid of patients with dementia with Lewy bodies
Source: PubMed Central journal article supplement — Ann Clin Transl Neurol. 2019 Oct 10;6(10):2120–6. doi: 10.1002/acn3.50897 (PMC6801172; doi:10.1002/acn3.50897), 2019-10-10

A

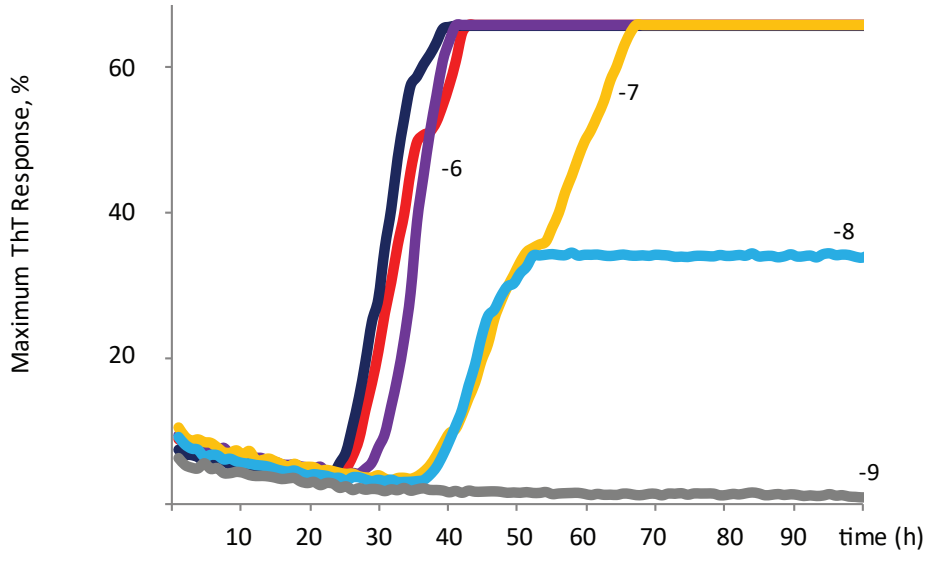

B

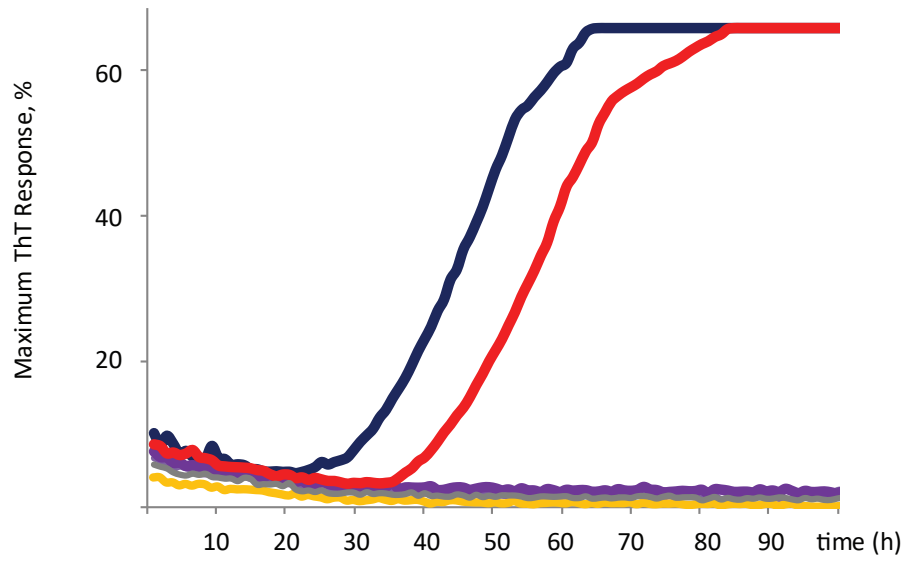

C

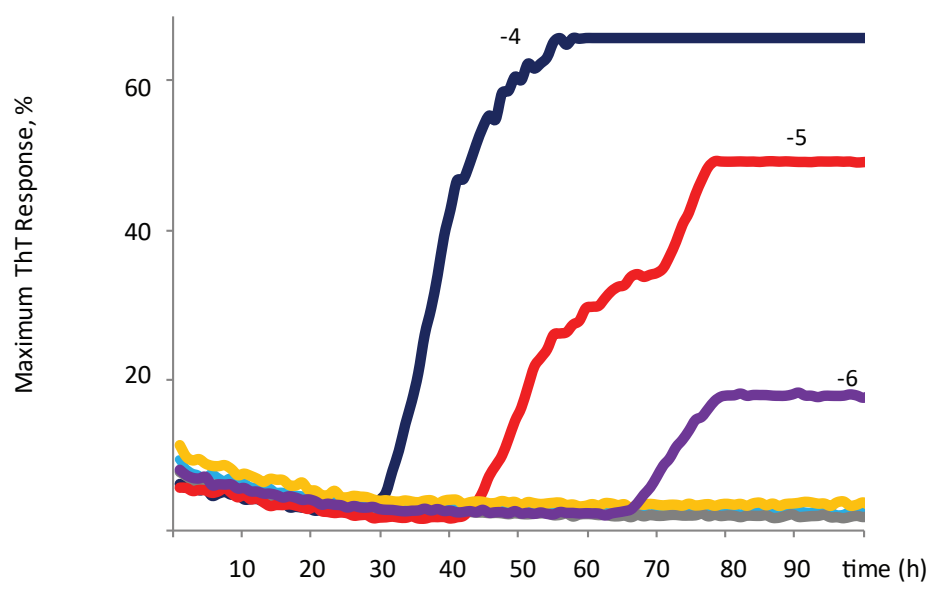

Supplement: ACN3-6-2120-s001.pdf [file ACN3-6-2120-s001.pdf]

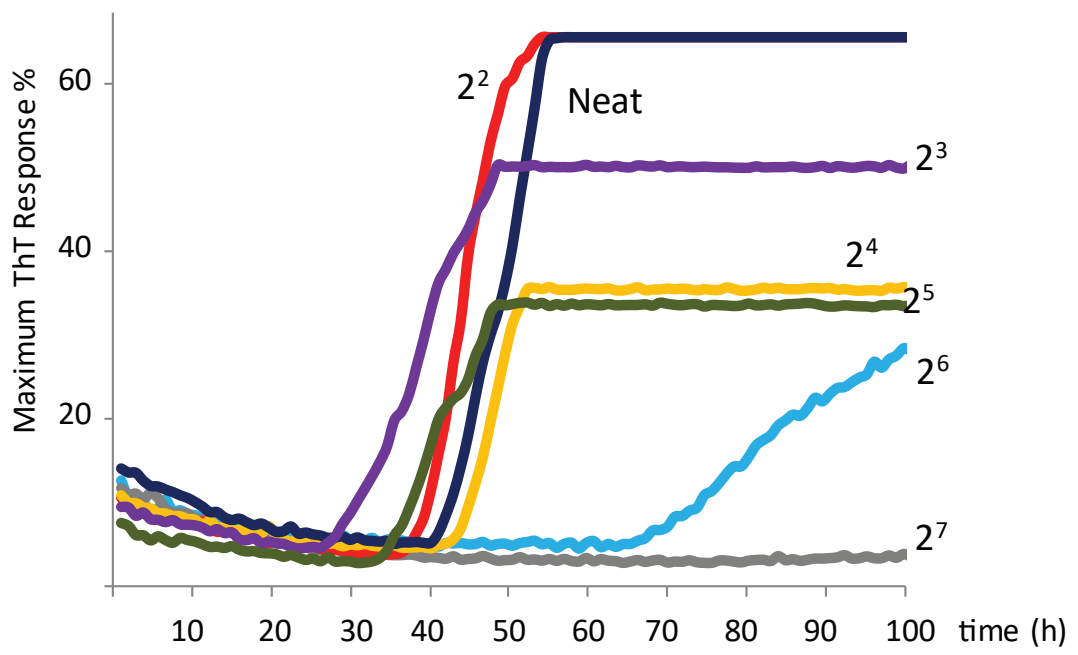

Supplement: ACN3-6-2120-s002.pdf [file ACN3-6-2120-s002.pdf]
